# Supplementary material
Source: PubMed Central journal article supplement (PMC3819123)
Supplement: NIHMS523382-supplement-1.pdf [file NIHMS523382-supplement-1.pdf]

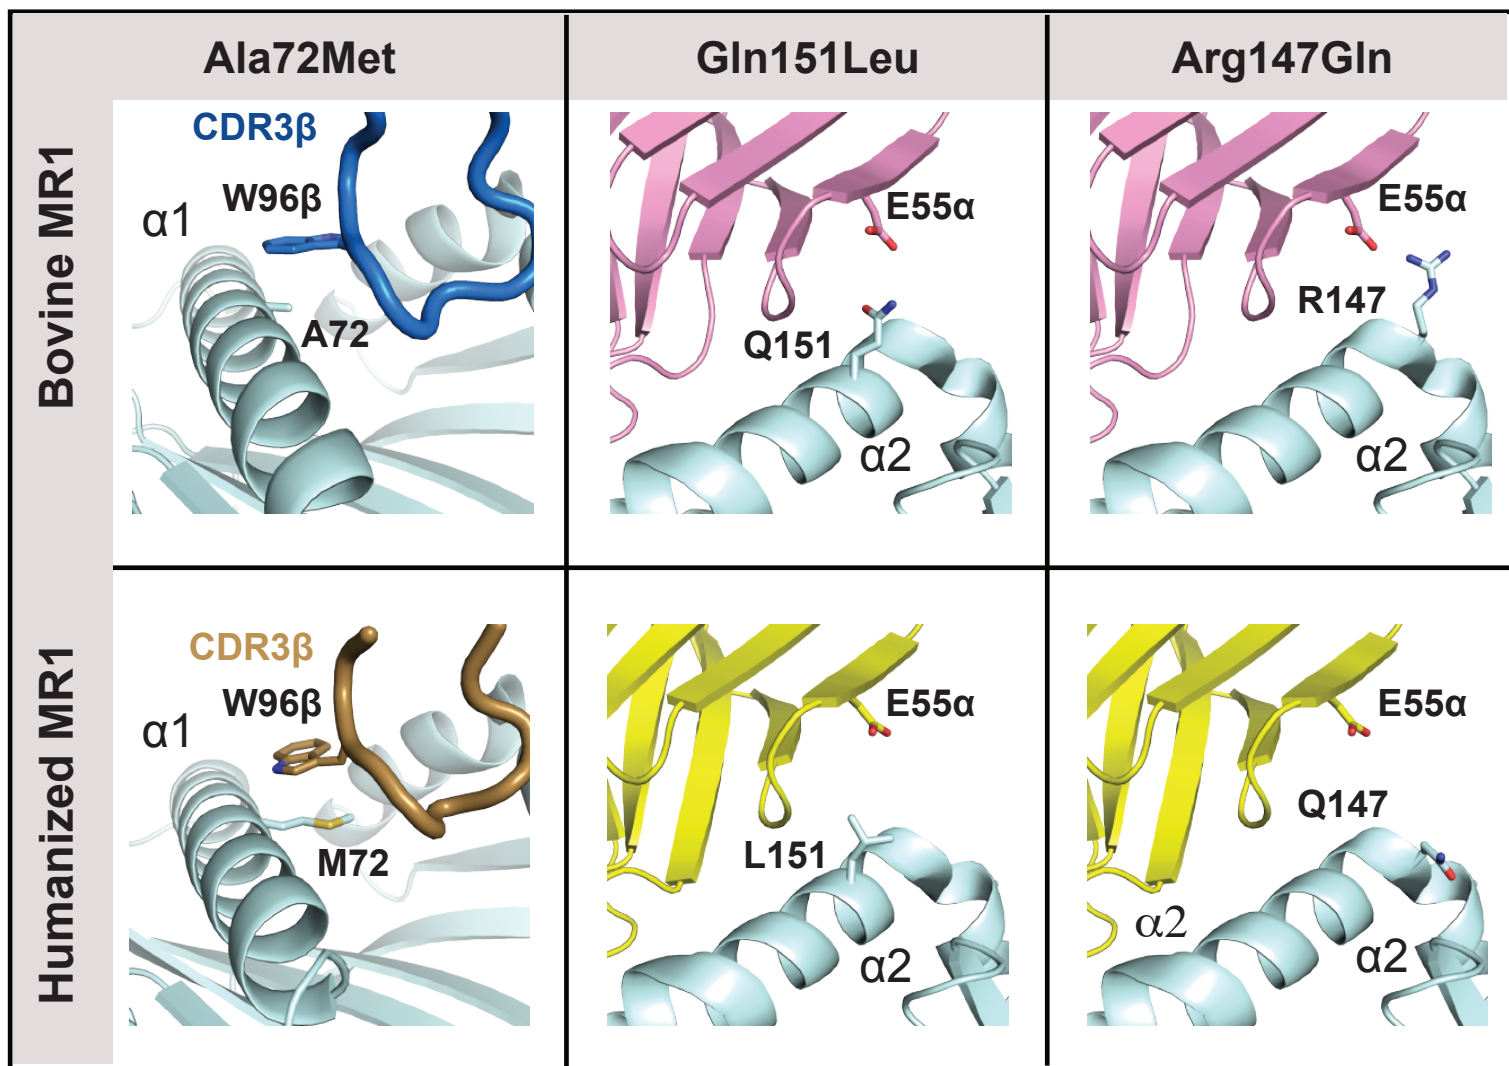

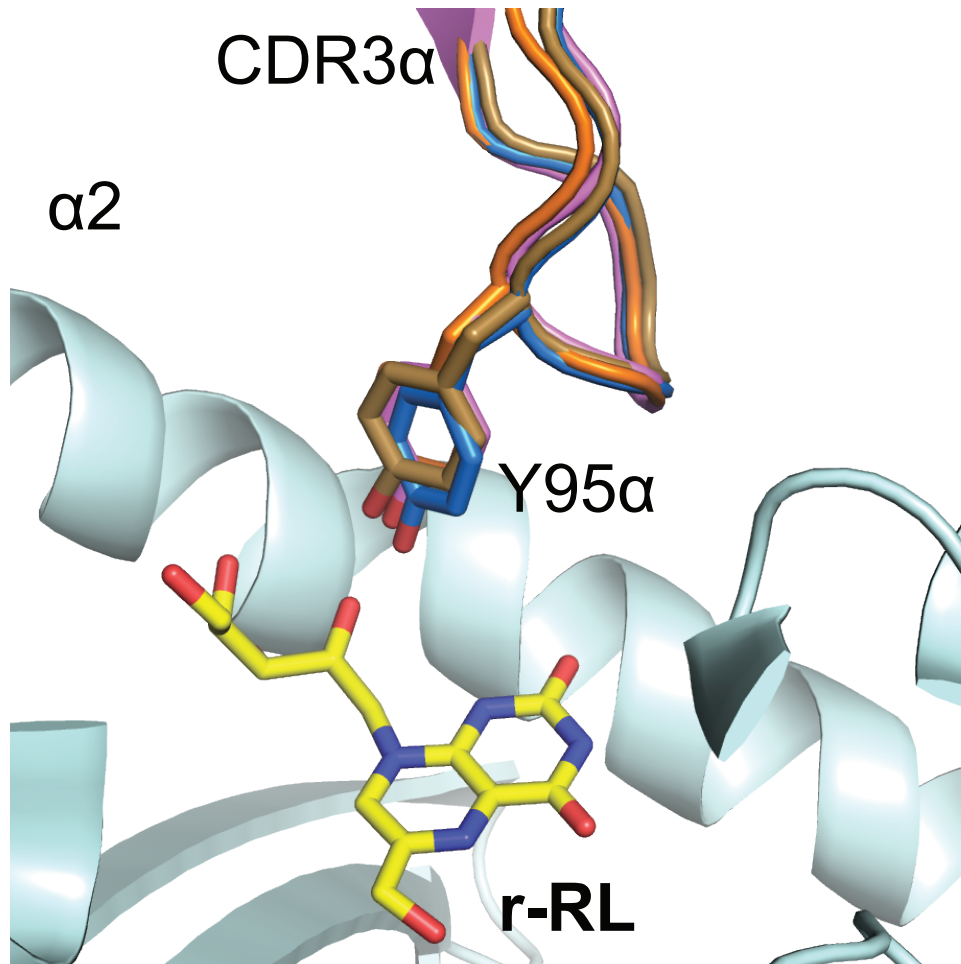

Human Va7.2Ja33 MAIT TCR/hbMR1/r\_RL

Human Va7.2Ja33 MAIT TCR/bMR1

Unliganded human Va7.2Ja33 MAIT TCR

Human Va7.2Ja33 MAIT TCR/hMR1/RL\_Me

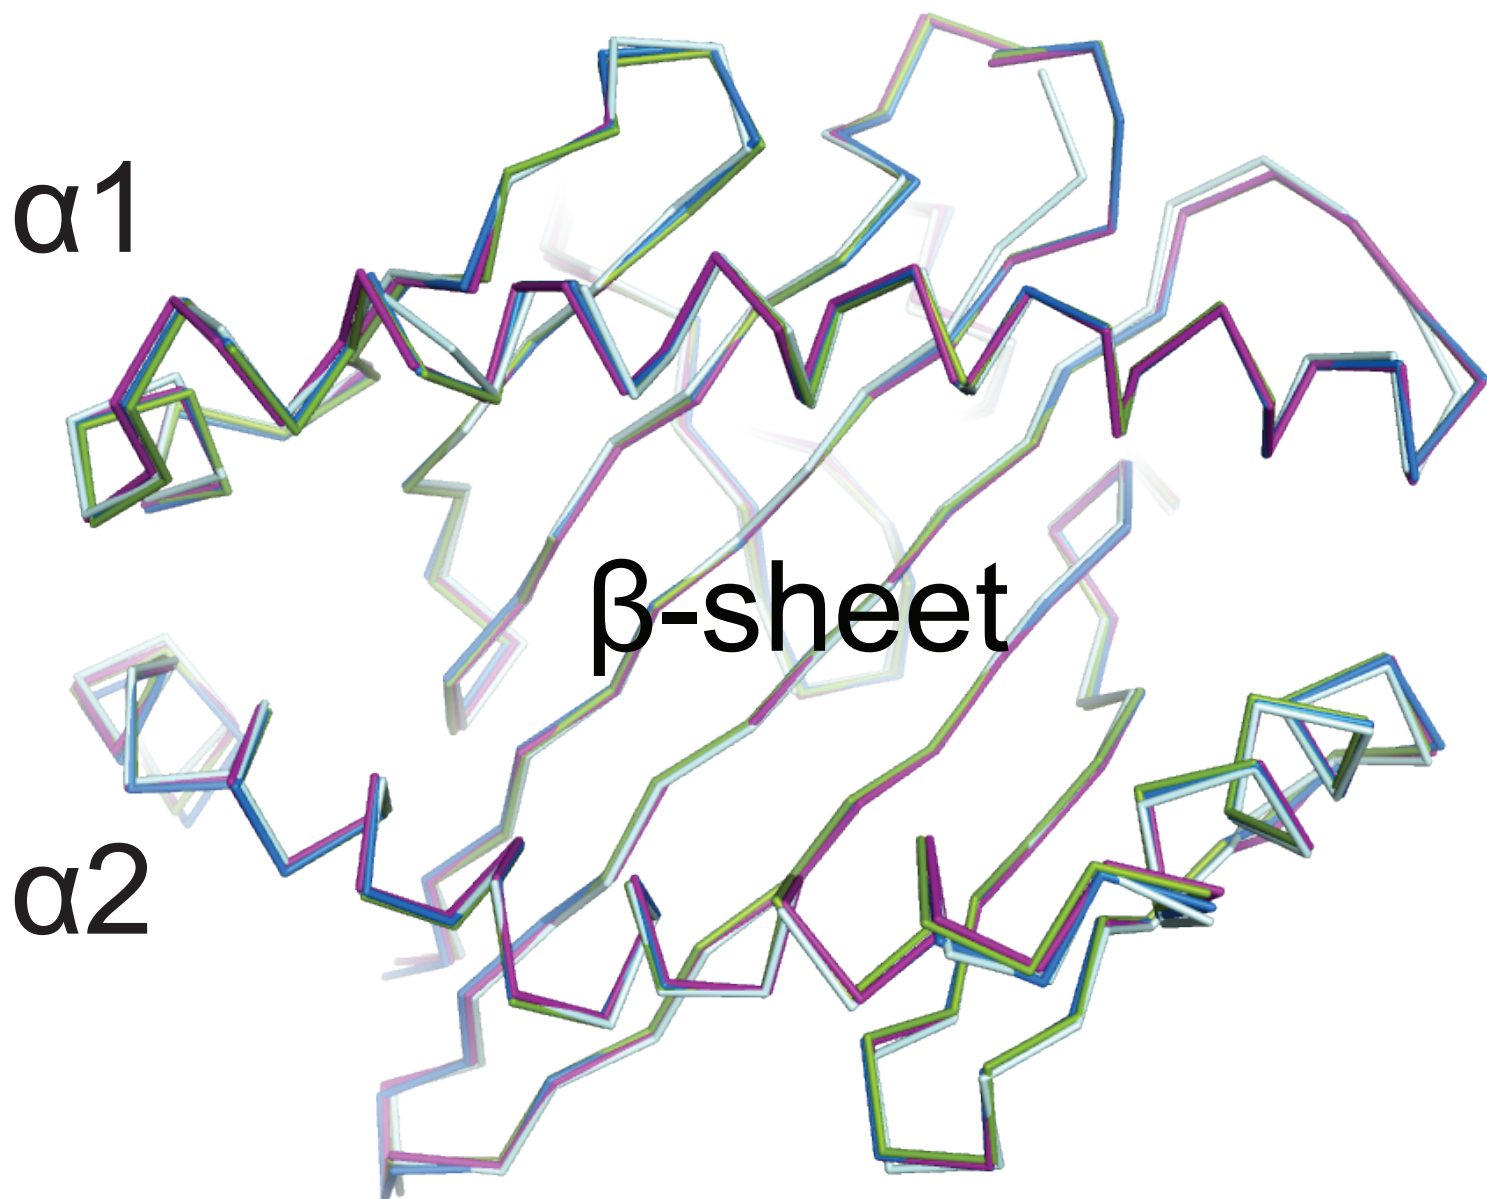

F7 MAIT TCR/hbMR1

G2 MAIT TCR/bMR1

F7 MAIT TCR/bMR1

AE6 MAIT TCR/bMR1

Supplementary Figure 4

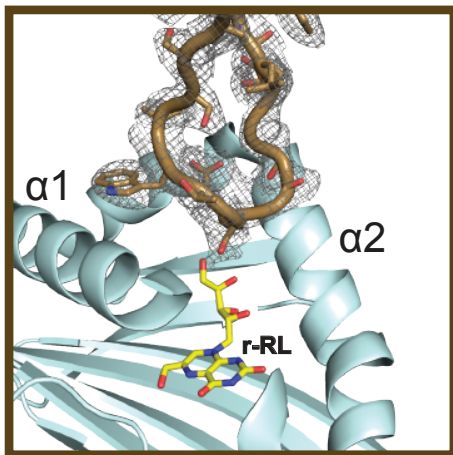

**F7 CDR3 $\beta$**   
**TRBV6-1/TRBJ2.2**

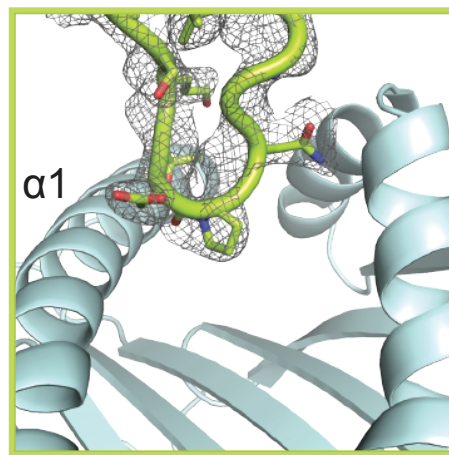

**G2 CDR3 $\beta$**   
**TRBV6-1/TRBJ2.2**

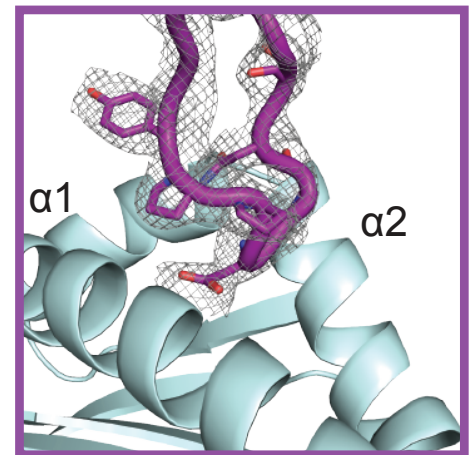

**AE6 CDR3 $\beta$**   
**TRBV6-2/TRBJ1.3**

**Supplementary Figure 1.** Detail of residues that are different in human and bovine MR1 that mediate MAIT TCR xenoreactivity. Our previous complex structure of a human MAIT TCR in complex with bovine MR1 (PDB ID: 4IIQ) allowed us to determine the residues in bovine MR1 that mediate the xeno-reactivity. These positions and their corresponding residues in bovine and human MR1 molecules are A72M, R147Q and Q151L. Displayed in this figure is a comparison of the positioning of these residues in both complexes with bovine and the hbMR1.

**Supplementary Figure 2.** The MAIT TCR CDR3 $\alpha$  loop and Tyr95, which contacts the stimulatory ligand rRL-6-CH<sub>2</sub>OH, adopt a rigid and conserved conformation that is independent of the ligand. Shown for comparison are the CDR3 $\alpha$  loops in cartoon representation and Tyr95, in sticks, of an unliganded MAIT TCR  $\alpha$  chain (orange, PDB ID: 4DZB), and those of the human F7 MAIT TCR bound to hbMR1/rRL-6-CH<sub>2</sub>OH (brown) and bovine MR1 (blue) as well as the human MAIT TCR bound to human MR1 with RL-6-Me-7-OH (RL\_Me) (mauve, PDB ID:4L4V). In all four cases, the MAIT TCR  $\alpha$  chain variable domains are encoded by the V $\alpha$ 7.2 and J $\alpha$ 33 gene segments. The unliganded TCR is aligned to the others via the V domain, the others are all aligned via the MR1 molecules to which they are complexed.

**Supplementary Figure 3.** Superposition of bovine and hbMR1 structures in the different complexes. Displayed in ribbons are the  $\alpha$ 1,  $\alpha$ 2 and  $\beta$ -sheet platforms of the

hbMR1 from the complex with the F7 MAIT TCR (cyan, PDB ID: 4IIQ) and bovine MR1 from the complexes with F7 (marine), G2 (green) and AE6 (purple) MAIT TCRs.

**Supplementary Figure 4.** Electron density maps for the MAIT TCR CDR3 $\beta$  loops. The CDR3 $\beta$  loops were omitted for the calculation of the initial phases and built along the refinement processes and according to positive electron density maps. Shown are the final  $2F_o - F_c$  electron density maps for the CDR3 $\beta$  loops for the human F7 MAIT TCR/hbMR1/rRL-6-CH<sub>2</sub>OH complex (left), human G2 MAIT TCR/bovine MR1 complex (center) and the human AE6 MAIT TCR/bovine MR1 complex (right).
